# Supplementary material
Source: PubMed Central journal article supplement (PMC3392010)

Supplementary Table for MS/MS Data

| Symbol  | Protein Name                                                   | Protein Accession # | # of Unique Peptides (Min-Max) | Peptide Sequences                                                                                                                                                                                                                                                                                             |
|---------|----------------------------------------------------------------|---------------------|--------------------------------|---------------------------------------------------------------------------------------------------------------------------------------------------------------------------------------------------------------------------------------------------------------------------------------------------------------|
| TRADD   | TNFRSF1A-associated via death domain                           | gi 281427214        | 2                              | <u>AGAEQLDSWLTDEER</u><br>LTCDSTGQGGATQVAPAGSK                                                                                                                                                                                                                                                                |
| PEA15   | astrocytic phosphoprotein PEA-15                               | gi 61557370         | 5                              | <u>DNLSYIEHIFEISR</u><br>ISEEDELDTK<br>LDKDNLSYIEHIFEISR<br>RPDLLTMVDYR<br>SEEITGSAWFSFLESHNK                                                                                                                                                                                                                 |
| TNFAIP2 | tumor necrosis factor alpha-induced protein 2                  | gi 212549631        | 2                              | <u>LDAQPAFVPEGR</u><br>PLFSLIK<br>QLLLVELAALLR                                                                                                                                                                                                                                                                |
| RelA    | nuclear factor NF-kappa-B subunit p65                          | gi 40538870         | 2                              | <u>DLEQAISQR</u><br>TPPYADPSLQAPVR                                                                                                                                                                                                                                                                            |
| NFKB-2  | nuclear factor NF-kappa-B subunit p100                         | gi 56605774         | 2-8                            | <u>APSEAPQSEQALDTLQR</u><br>ASDGSFSLPLKPVISQPIHDSK<br>DPAPETADGPYLIVIEQPK<br>EDSAYGSQSVEQAEAK<br>GGDEVYLLCDK<br>LAGDVLVGLLEALSDMGLHEGVR<br>QFTYYPLVEDKEEVQR<br>TFAGNTPLHLAAGLGSPTLTR<br>TPLHLATEMEELGLVTHLVTK<br>VMDLSIVR                                                                                     |
| IKBIP   | inhibitor of nuclear factor kappa-B kinase-interacting protein | gi 148539967        | 2-5                            | AHLPTIENAVHSVLR<br>GGAGWADPR<br>INSAEQEIK<br>LESTENTLQEATSSMSLMTQFEQEVAGLQR<br><u>LLQTESSEFQGLQSK</u><br>SIHDIENSEMLTQK<br>TLVEMSDNTAVFK<br>VSQDLIGTER                                                                                                                                                        |
| MKK1    | dual specificity mitogen-activated protein kinase kinase 1     | gi 13928886         | 5-9                            | DVKPSNILVNSR<br>ELELLFGCQVEGDAEATPPRPR<br><u>ISELGAGGGVVFQ</u><br>KKPTPIQLNPADGSAVNGTSSAETNLEALQK<br>KLELELDEQQR<br>KLIHLEIKPAIR<br>LCDFGVSGQLIDSMANSFVGR<br>LIHLEIKPAIR<br>LPSGVFSLEFQDFVNK<br>RLEAFLTQK<br>RSDAEVDFAGWLCSTIGLNQPTPTHAASI<br>TPGRPLSSYGMDSRPMAIFELLDYIVNEPPPK<br>VGELKDDDFEK<br>VSHKPSGLVMAR |
| MKK3    | mitogen activated protein kinase kinase 3                      | gi 197333734        | 2                              | FPYESWGTFPFQQLK<br>QVVEEPPQLPADQFSPEFVDFTSQCLR                                                                                                                                                                                                                                                                |
| MKK4    | dual specificity mitogen-activated protein kinase kinase 4     | gi 71795640         | 2                              | DLGEIRGAYGSVNKMVHK<br>WNSVFDQLTQVVK<br><u>YVYSVLDDYVPEEILGK</u>                                                                                                                                                                                                                                               |
| ERK2    | mitogen-activated protein kinase 1                             | gi 16758698         | 6-11                           | ALDLLDK<br>APEIMLNSK<br>DLKPSNLLLNTTCDLK<br>DVYIVQDLMETDLYK<br>FDMELDDLK<br>FRHENIIGINDIIR<br><u>GQVFDVGPR</u><br>HYLDQLNHLGILGSPSQEDLNCIINLK<br>ISPFEHQTYCQR<br>IEVEQALAHPLYEQDYDPSDEPIAEAPFK<br>NYLLSLPHK<br>VADPDHHTGFLTEYVATR<br>YIHSANVLHR                                                               |

Representative Spectra

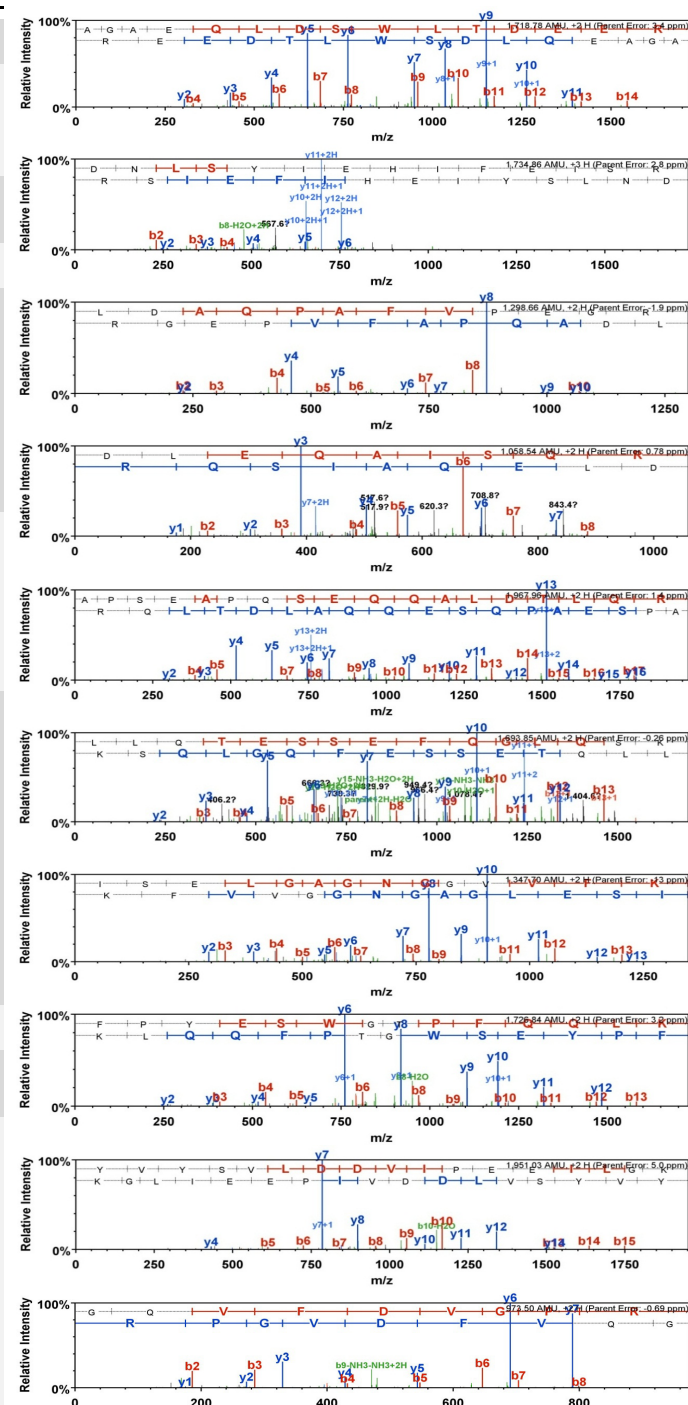

|        |                                             |             |       |                                                                                                                                                                                                                                                                                                                                                                                                                                                                                                             |
|--------|---------------------------------------------|-------------|-------|-------------------------------------------------------------------------------------------------------------------------------------------------------------------------------------------------------------------------------------------------------------------------------------------------------------------------------------------------------------------------------------------------------------------------------------------------------------------------------------------------------------|
| ERK1   | mitogen-activated protein kinase 3          | gi 8393331  | 2-6   | <p>YTNL<sup>SY</sup>IGEGAYGMVCSAYDNLNK</p> <p>APEIMLNSK</p> <p>AP<sup>T</sup>LEAMR</p> <p>DLKPSNLLINTTCDLK</p> <p>DVYIVQDLMETDLYK</p> <p>ELIFQETAR</p> <p><u>GTAGVVPVVPGEVEVK</u></p> <p>IADPEHDHTGFLTEYVATR</p> <p>ISPFEHQTYCQR</p> <p>NYLQSLPSK</p> <p>YIHSANVLHR</p> <p>YTQLQYIGEGAYGMVSSAYDHVR</p>                                                                                                                                                                                                      |
| P38    | mitogen-activated protein kinase 14         | gi 62461582 | 2     | <p>HENVIGLLDVFTPAR</p> <p>ILDFGLAR</p> <p>MNFANVFIGANPLAVDLLEK</p> <p><u>NYIQSLAQMPK</u></p> <p>SLEEFNDVYLVTHLMGADLNNIVK</p>                                                                                                                                                                                                                                                                                                                                                                                |
| ROCK2  | rho-associated protein kinase 2             | gi 6981478  | 2-8   | <p>DATIASLEETNR</p> <p>DS<sup>D</sup>IEQLR</p> <p>EFINLQSALESER</p> <p>ETAAPVVPPELSSDIDSSNFDDIEDDKGDVETFFPIPK</p> <p>GAFGEVQLVR</p> <p>IFQILYANEGESK</p> <p>ISGLEEDLK</p> <p><u>LEGWLSLPVR</u></p> <p>NLICAFLTDR</p> <p>SIAEEQYS<sup>D</sup>LEK</p> <p>TLTSDVANLANEKEELN<sup>NK</sup></p> <p><u>EEWTTAIQT<sup>V</sup>ADGLK</u></p> <p>ITDFGLCK</p>                                                                                                                                                          |
| AKT1   | RAC-alpha serine/threonine-protein kinase 1 | gi 15100164 | 2     | <p><u>AAIANLCIGDLTAIDGEDTSSMTHLEAQNK</u></p> <p>CGTGIVGVFVK</p> <p>D<sup>F</sup>EQPLAISR</p> <p>GCVDNMTLTVSR</p> <p>GHFFVGDQIYCEK</p> <p>IWSPLVTEEGK</p> <p>IWSPLVTEEGKR</p> <p>MNLASEPQEV<sup>L</sup>HIGSAHNR</p> <p>PSAQPHPSGGLI<sup>D</sup>K</p> <p>PSAQPHPSGGLI<sup>D</sup>KESEVYK</p> <p>QSTSFLVLQEILESDGK</p> <p>QSTSFLVLQEILESDGKDPNKPSGFR</p> <p>SAMPFTASPAGTR</p> <p>TSASGEEANSRPSAQPHPSGGLI<sup>D</sup>K</p> <p>TSASGEEANSRPSAQPHPSGGLI<sup>D</sup>KESEVYK</p> <p>VITNQYNSPTGLYSSENISFNNAVESK</p> |
| PDLIM1 | PDZ and LIM domain protein 1                | gi 8393153  | 14-17 | <p>VTPPEGYDVVTVFPK</p> <p>AAQAGVAVGDWVLSIDGENAGSLTHIEAQNK</p> <p><u>AFYMEEGAPY<sup>C</sup>ER</u></p> <p>DFNVPLSISR</p> <p>GAIFCPSCYDVR</p> <p>HSQPATPTPLQNR</p> <p>ITGEIMHALK</p> <p>MTWHVPCFTCAACK</p> <p>TARPFGAPPTDSALSQNGQLLR</p> <p>TEAPAPASTIPQESWPGTTPSPTS<sup>R</sup>PPWAVDPAPAER</p> <p>TSIVQAAAGGGTGGGSNNGK</p> <p>VLEEGGFEEK</p> <p>VVLEGPAPWGFR</p>                                                                                                                                             |
| PDLIM7 | PDZ and LIM domain protein 7                | gi 27465579 | 7-10  | <p>YLVALGHAYHPPEFVCSQCGK</p> <p>ALIQYFSPYVSADMHK</p> <p>DSQTQAILTK</p> <p><u>GHDDLGDHYLDCGDL<sup>S</sup>NALK</u></p> <p>HVINMCLNVIK</p> <p>LFLELEPQVR</p> <p>MAAAFNTTVAALEDELTLQILEGLINAR</p> <p>MALSFVQVR</p>                                                                                                                                                                                                                                                                                              |
| SGN1   | COP9 signalosome complex subunit 1          | gi 42476092 | 2-5   | <p>ELNIDVADVESLLVQCILDNTIHGR</p>                                                                                                                                                                                                                                                                                                                                                                                                                                                                            |

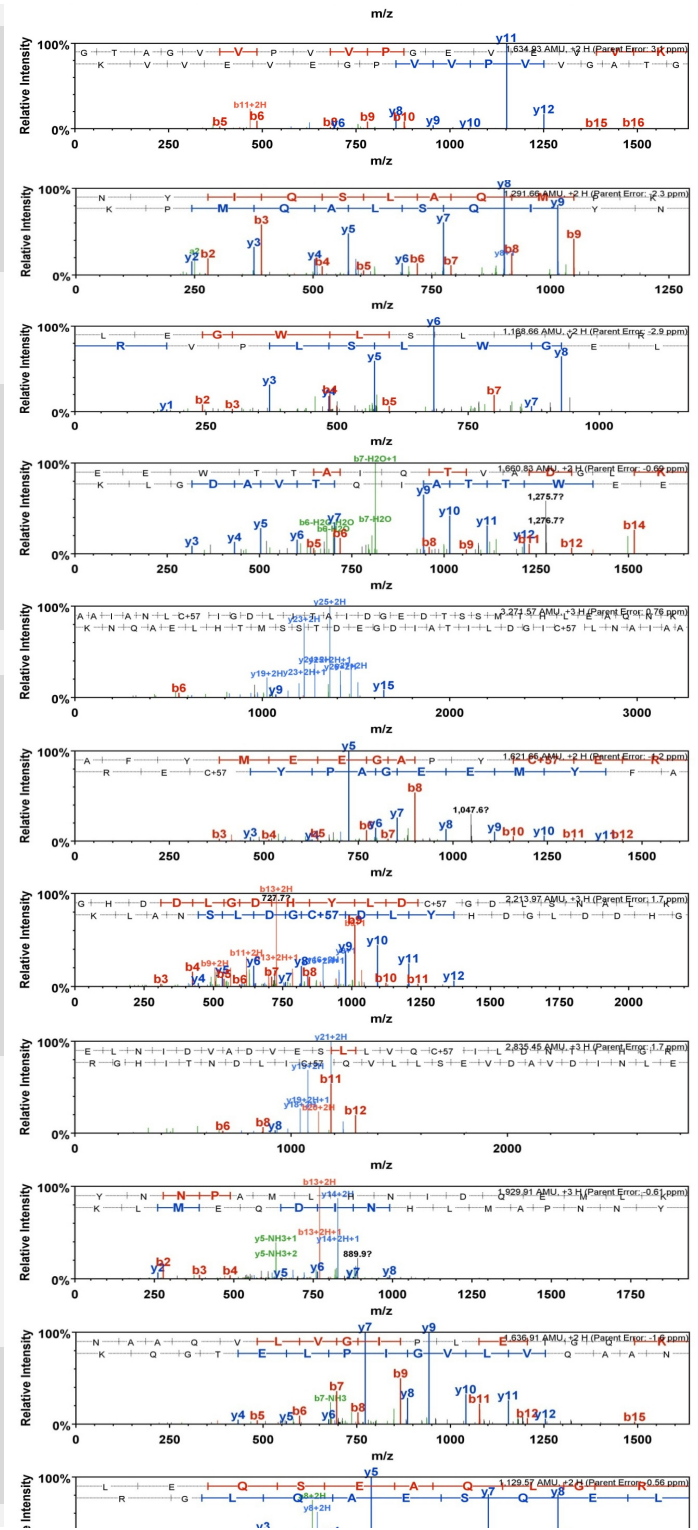

|         |                                                         |              |                                                                                                                                                                                                                                                                                                                                                                                                                                                                                                       |
|---------|---------------------------------------------------------|--------------|-------------------------------------------------------------------------------------------------------------------------------------------------------------------------------------------------------------------------------------------------------------------------------------------------------------------------------------------------------------------------------------------------------------------------------------------------------------------------------------------------------|
|         |                                                         |              | <p>IDQVNQLLELDHQK<br/> QLHQSCQTDGDDLLK<br/> QMDLLQEFYETLEALK<br/> SAIPHPLIMGVIR<br/> SINSILDYISTSK<br/> TNHSNIMDDPFIR<br/> WTNQLNSLNQAVVSK<br/> QLSAQGMOTQLCELINK<br/> SMGSEQDDSGNKPSSYS<br/> VQLSGPQAEAK<br/> YATDTFAGLCHQLTNALVER<br/> YNNPAMLHNDIQEMLK<br/> YTSQIVGR</p>                                                                                                                                                                                                                           |
| SGN3    | COP9 signalosome complex subunit 3                      | gi 51948372  | 2-5                                                                                                                                                                                                                                                                                                                                                                                                                                                                                                   |
| SGN4    | COP9 signalosome complex subunit 4                      | gi 51948518  | 3-8                                                                                                                                                                                                                                                                                                                                                                                                                                                                                                   |
|         |                                                         |              | <p>ATTADGSSILDR<br/> CQQLAAYGILEK<br/> HALHCTILASAGQQR<br/> IASQMITEGR<br/> ISQTAPEWTAQAMEAQMAQ<br/> LYLEDDDPVQAEAYINR<br/> LYNNITFEELGALLEIPAAK<br/> NAAQVLVGIPLTEGQK<br/> QLLTDFTCHLPNLPDSTAK<br/> GYKPPDEGPSEYQTIPLNK<br/> ISALALLK<br/> LEQSEAQLGR<br/> LLELLWLNK</p>                                                                                                                                                                                                                             |
| SGN5    | COP9 signalosome complex subunit 5                      | gi 71043620  | 2-4                                                                                                                                                                                                                                                                                                                                                                                                                                                                                                   |
| SGN6    | COP9 signalosome complex subunit 6                      | gi 157821399 | 3-4                                                                                                                                                                                                                                                                                                                                                                                                                                                                                                   |
| COPS7A  | COP9 complex subunit 7a isoform 2                       | gi 255760057 | 2-3                                                                                                                                                                                                                                                                                                                                                                                                                                                                                                   |
| SGN8    | COP9 signalosome complex subunit 8                      | gi 61557351  | 3-4                                                                                                                                                                                                                                                                                                                                                                                                                                                                                                   |
|         |                                                         |              | <p>ASEAGEVPFNHEILR<br/> LILEYVK<br/> PMQVIGALIGK<br/> QVCEIIESPLFLK<br/> TCNTMNMQFVNK<br/> ELADSDFASTFR<br/> QLEDLVIEAVYADVLR<br/> VTTAAAAAATSQDPPEQHLELRL<br/> FIPLSEPAVPPIPEQQLAR<br/> GVLEQGWQADSTTR<br/> KPAPGALDVSLNR<br/> LTDYVAFLEN<br/> SANSELGGIWSVGQR<br/> DIDAFWLQR<br/> DTLGLFLR<br/> EEEVTPGPIAFLPFQK<br/> ETYEVLISFIAALGDQPR<br/> FYDDAIVSQK<br/> NQVLVHVSR<br/> PFGSEEQLLPVEK<br/> RLDLVHTAALMLDK<br/> TLVEDLFADK<br/> WLSCTQLPVFSFR<br/> WTELGALDILQMLGR<br/> YPPPTLELDLQPLVPSALR</p> |
| ASCC311 | activating signal cointegrator 1 complex subunit 3-like | gi 281371480 | 2-7                                                                                                                                                                                                                                                                                                                                                                                                                                                                                                   |
|         |                                                         |              | <p>AAMIWIVGEYAEK<br/> CVSTLLDIQTK<br/> DCEDPNPLIR<br/> DCPLNTEAASSK<br/> DIPNENAQFQIR<br/> DLDYATLLK<br/> ITEYLCEPLR<br/> KGEIFELK<br/> KPTETQELVQVLSLATQSDNPDLR<br/> LASQANIAQVLAELK<br/> LDIMIR<br/> LGAPVSSGLSDLFDLTSGVGTLSGSYVAPK<br/> LQSSNIFTVAK<br/> LSHANSVAVLSAVK<br/> LVLYLMNYAK<br/> MEPLNLLQVAVK<br/> NINLVQK</p>                                                                                                                                                                         |
| APIB1   | AP-1 complex subunit beta-1                             | gi 8392872   | 2-6                                                                                                                                                                                                                                                                                                                                                                                                                                                                                                   |

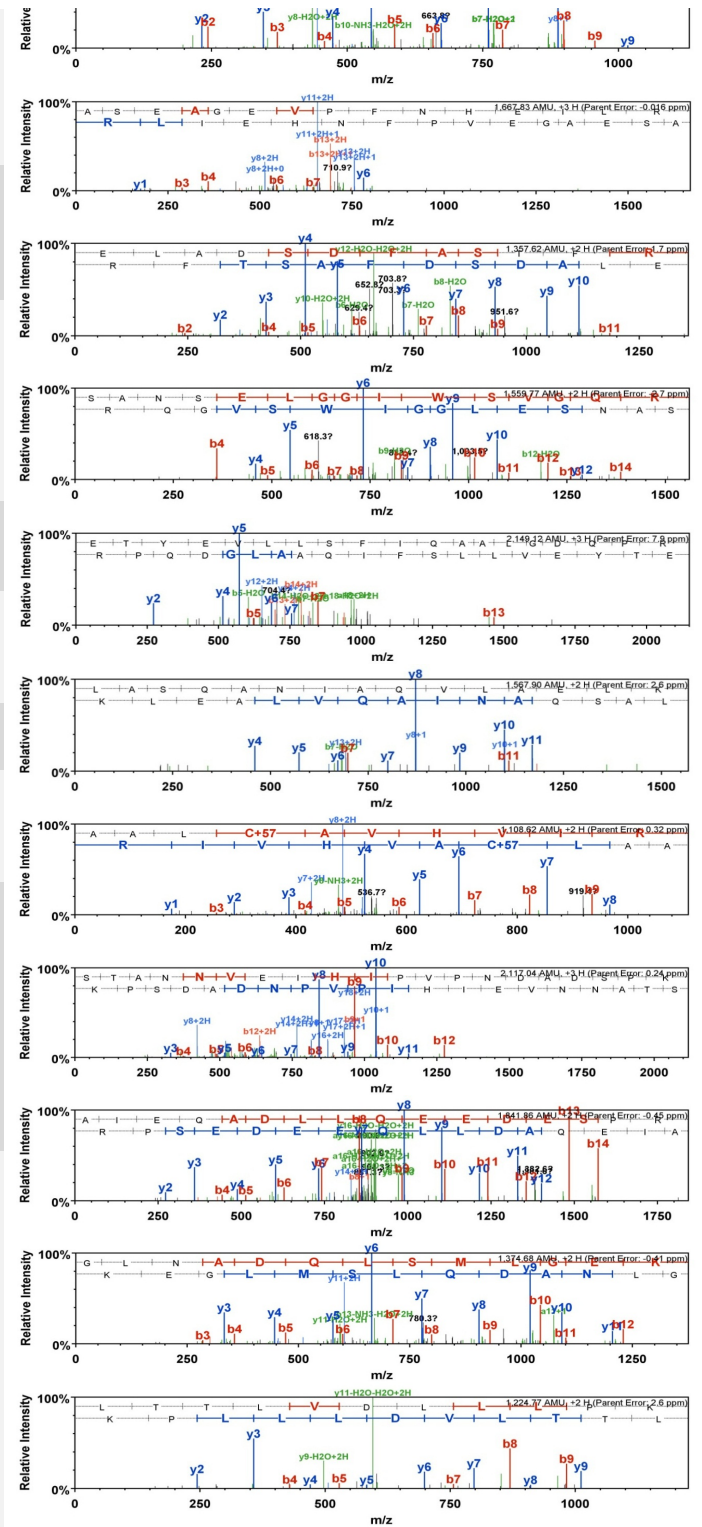

|        |                                                                  |              |      |                                                                                                                                                                                                                                                                                                                     |
|--------|------------------------------------------------------------------|--------------|------|---------------------------------------------------------------------------------------------------------------------------------------------------------------------------------------------------------------------------------------------------------------------------------------------------------------------|
| AP1G1  | AP-1 complex subunit gamma-1                                     | gi 189491695 | 2-5  | NSFGLAPAALQVHAPLSPNQTVESILPLNTVGSVMK<br>TVEGQDMLYQSLK<br>VNYVVQEAIVVVK<br>YNDPIYVK<br><u>AALCAVHVIR</u><br>ADCASGVFLAAEK<br>AVEYNALFK<br>KVPELMEFLPATK<br>NVGNAILYETVLTIMDIK<br>TFQLQLLSPSSVVPAFNTGTITQVIK<br>VLAINILGR<br>VLTTAGSYVR<br>YVALTSLLK                                                                  |
| AP1M1  | AP-1 complex subunit mu-1                                        | gi 112984344 | 2-5  | EEEGMLSPILAHGGVR<br>FEIPYFTTSGIQVR<br>LETGAPRPPATVTVNAVSWR<br>SGYQALPWVR<br>STANNVEIHIPVPNDADSPK<br>VFLSGMPELR<br>VVQVFSEYFK                                                                                                                                                                                        |
| AP1S1  | AP-1 complex subunit sigma-1                                     | gi 205360945 | 2    | <u>AIEQADLLQEEDESPR</u><br>MCSFLEWR<br>WYLATSDKER                                                                                                                                                                                                                                                                   |
| STAT1  | signal transducer and activator of transcription 1 isoform alpha | gi 77695926  | 3-10 | DQQPGTFLLR<br>ELSAVTFPDIIR<br>FHDLLSQLDDQYSR<br>FNQAQEQNIQNTVMLDK<br>FTYEQDPITK<br><u>GLNADQLSMLGEK</u><br>IRELLNSIELTQNTLINELVEVK<br>KFNILGTHTK<br>LLGPNAGPDGLIPWTR<br>MFLMLDNK<br>TGQVFTVK<br>TLEDLQDEYDFK<br>VMAAENIPENPLK<br>VSFDKDVNEK                                                                         |
| STAT2  | signal transducer and activator of transcription 2               | gi 58865380  | 2-3  | EVLQSLPLTEIR<br>IPFWTWLDK<br><u>LTTLVDLLPK</u><br>QADELQQLLELK<br>SCIGAPAPQLDQLEQWLTAGAK                                                                                                                                                                                                                            |
| STAT3  | signal transducer and activator of transcription 3               | gi 6981592   | 5-11 | AILSTKPPGTFLLR<br>ESHATLVFHNNLGEIDQQYSR<br>FPELNYQLK<br>GLSIEQLTLAEK<br>IMDATNILVSPVLYLPDIPK<br>IMDATNILVSPVLYLPDIPKEEAFGK<br>KFNILGTNTK<br>LENWITSLAESQLQTR<br>LLGPGVNYSGCQITWAK<br>LLQTAATAAQGGQANHPTAAVVTEK<br>SIVSELAGLLSAMEYVQK<br>TLTDEELADWK<br>TQIQSVEPYTK<br>VVENLQDDDFDFNYK<br><u>YLEQLHQLYSDFSMPMELR</u> |
| STAT6  | signal transducer and transcription activator 6                  | gi 113205500 | 2    | FLLGLQFLGTSAPKPLVR<br>FSDSEIGGIIAHVIR<br><u>GSSLQHQHISTLESYQR</u>                                                                                                                                                                                                                                                   |
| TLR2   | toll-like receptor 2                                             | gi 38454274  | 2    | NSFQPMPSDQWPVK<br>TLPEASLFPVLQVMK                                                                                                                                                                                                                                                                                   |
| TOLLIP | toll-interacting protein                                         | gi 157823763 | 2-3  | DAAINSLLOMGEEES<br><u>GPVYIGELPQDFLR</u>                                                                                                                                                                                                                                                                            |
| IRGQ   | immunity-related GTPase family, Q                                | gi 209364508 | 2    | IAWTHITIPESLK<br>ALPTAQAGALLALPPASPR<br><u>DETAALLDSAGLGAAPFLVLPADCSSSDGCEELER</u><br>NVDAVEIPDGRPDSGVPSLR                                                                                                                                                                                                          |

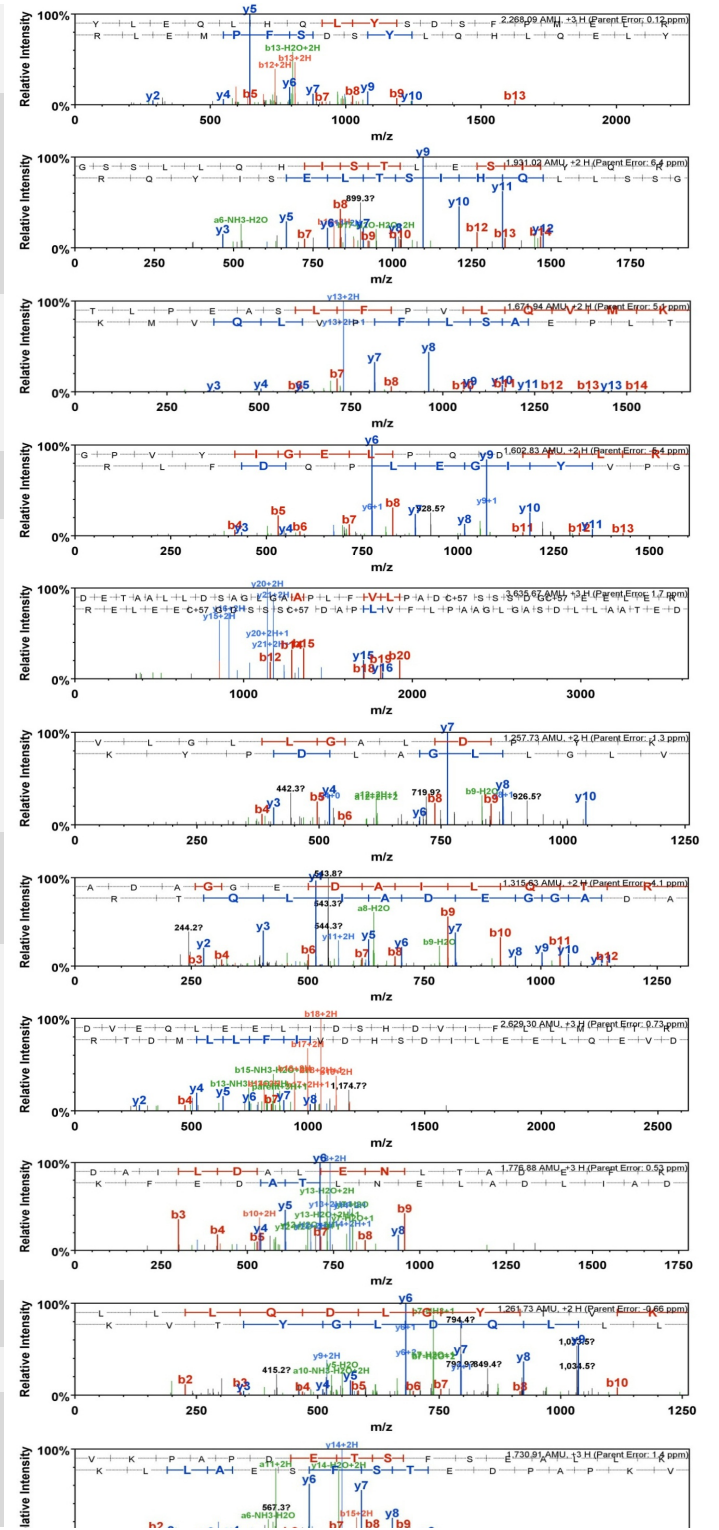

|        |                                                               |              |     |                                                                                                                                                                   |
|--------|---------------------------------------------------------------|--------------|-----|-------------------------------------------------------------------------------------------------------------------------------------------------------------------|
| mTOR   | serine/threonine-protein kinase mTOR                          | gi 9845251   | 2   | <u>VLGLGALDPYK</u><br>TNYTRSLAVMSMVGYILGLGDRHPSNLMLDR                                                                                                             |
| ATG3   | ubiquitin-like-conjugating enzyme autophagy-related 3         | gi 19705511  | 2-4 | <u>ADAGGEDAILQTR</u><br>ALEVAEYLTPLVK<br>FVQAVIPTIEYDYTR<br>LWLFYDEQNR                                                                                            |
| ATG7   | ubiquitin-like modifier-activating enzyme autophagy-related 7 | gi 58865764  | 2-3 | <u>DVEQLEELIDSHDIVFLMDTR</u><br>FDNVLPVSLAFDK<br>LLEQSANWEWAIK<br>LPEMAFSPDCPK<br>SGAALENPMLLNK<br>YDDDTLVLSLLK                                                   |
| NLRP1  | apoptosis-associated speck-like protein containing a CARD     | gi 27229294  | 4-6 | <u>DAILDALENLTADEFK</u><br>DAILDALENLTADEFKK<br>DMGIQELAEQLQK<br>GALLQMDPIDLTDK<br>IMEESGAVATATSPAQGTAR<br>NLFLAALR<br>QTQPYLVTDLEQS<br>VTKV DGLLDALYGNVLTEGQQAVR |
| CASP1  | caspase-1                                                     | gi 31542341  | 2   | <u>LLLQDLGYTVK</u><br>VLNQEEMDTIK                                                                                                                                 |
| ILF2   | interleukin enhancer-binding factor 2                         | gi 114145744 | 2-3 | <u>QPLALNVAYR</u><br><u>VKPAPEDETSFSEALLK</u><br>VLQSALAAIR<br>WFEENASQSTVK                                                                                       |
| ILF3   | interleukin enhancer-binding factor 3                         | gi 16758150  | 2-3 | <u>AYAALAALEK</u><br>GWPLELLCEK<br>VLGMDPLPSK                                                                                                                     |
| IL-1RA | interleukin-1 receptor antagonist protein                     | gi 11559964  | 3-6 | <u>FYFQEDQ</u><br>IDMVPIDFR<br>LQLEEVNITDLNK<br>NNQLIAGYLQGPNTK<br>NVFLGIHGKK<br><u>SETGPTTSFESLACPGWFCLTLEADHPVSLTNTPK</u>                                       |
| TGFB2  | transforming growth factor beta-2                             | gi 13592109  | 2   | <u>FAGIDGTSTYASGDQK</u><br>IELYQILK                                                                                                                               |
| TGFB3  | transforming growth factor beta-3                             | gi 6981650   | 2-3 | <u>ALDTNYCFR</u><br>IELFQILRPDEHIAK<br>VEQLSNMVVK                                                                                                                 |
| MIF    | macrophage migration inhibitory factor                        | gi 13591985  | 2-3 | <u>ASVPEGFSELTTQQLAQATGK</u><br>LLCGLLSDR<br>PAQYIAVHVDPQLMTFSGTSDPCALCSLHSIGK                                                                                    |
| GMFB   | glia maturation factor beta                                   | gi 13624295  | 2-4 | <u>LVQTAELTK</u><br>LVLDEELEGVSPDELK<br>LVLDEELEGVSPDELKDELPK<br><u>NTEDLTEEWLR</u>                                                                               |
| GMFG   | glia maturation factor gamma                                  | gi 30842809  | 2   | <u>LVQIAELTK</u><br>QMVVLEDEFQNVSPPEELK                                                                                                                           |
| GFAP   | glial fibrillary acidic protein                               | gi 158186732 | 3-5 | <u>ALAAELNQLR</u><br>GTNESLER<br><u>HLQEYQDLLNVK</u>                                                                                                              |

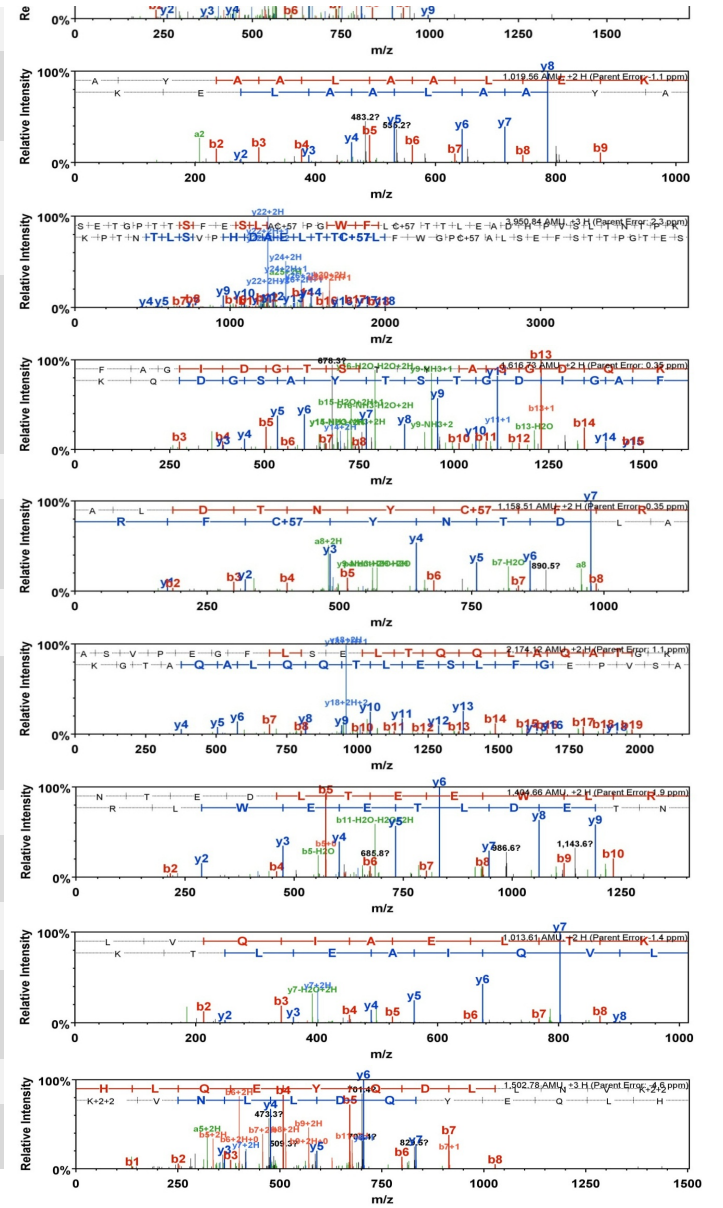

Supplement: supp_11-9101_IOVS-11-9101-s01.pdf [file supp_11-9101_IOVS-11-9101-s01.pdf]
